# Supplementary material
Source: Royal Society of Chemistry journal article supplement (doi:10.1039/d6gc02863b)
Supplement: d6gc02863b1.pdf [file d6gc02863b1.pdf]

## Supplementary Information

### High Solid-to-Liquid Ratio Leaching of Strategic Metals from Spent Lithium-Ion

#### Batteries: Design of a Green and Sustainable Deep Eutectic Solvent System

Wen-hao Gao<sup>a</sup>, Xiang-nan Zhu<sup>\*a</sup>, Chun-liu Hu<sup>a</sup>, Gu-yue Li<sup>c</sup>, Zheng-qiang Cao<sup>d</sup>, Shuai  
Yan<sup>b</sup>, Wen-tao Zhou<sup>\*a</sup>

<sup>a</sup> College of Energy and Mining Engineering, Shandong University of Science and  
Technology, Qingdao 266590, P.R. China

<sup>b</sup> School of Materials and Chemical Engineering, Ningbo University of Technology,  
Ningbo City 315211, P.R. China

<sup>c</sup> School of Materials Science and Engineering Nanyang Technological University,  
639798, Singapore

<sup>d</sup> School of Minerals Processing and Bioengineering, Central South University,  
Changsha 410083, P.R. China

**Supporting Information include:**

**Supporting Figures 1 to 23**

**Supporting Tables 1 to 11**

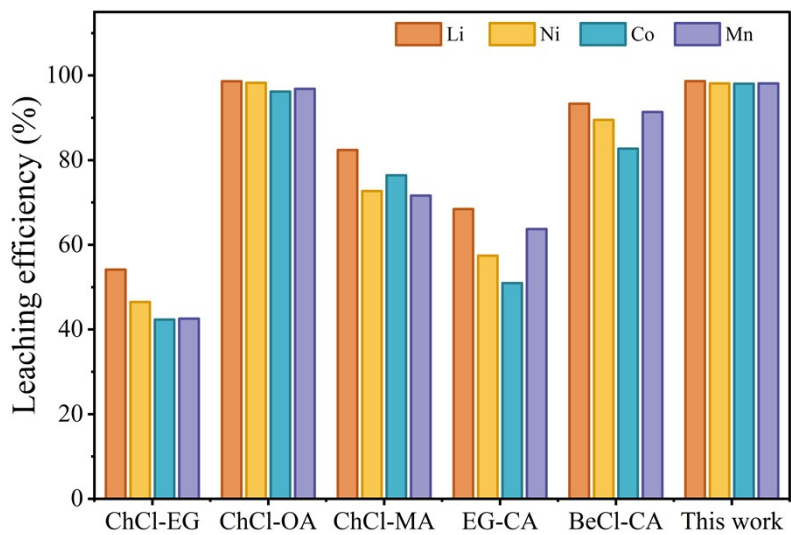

**Figure S1** Comparison of leaching efficiencies of different binary DESs.

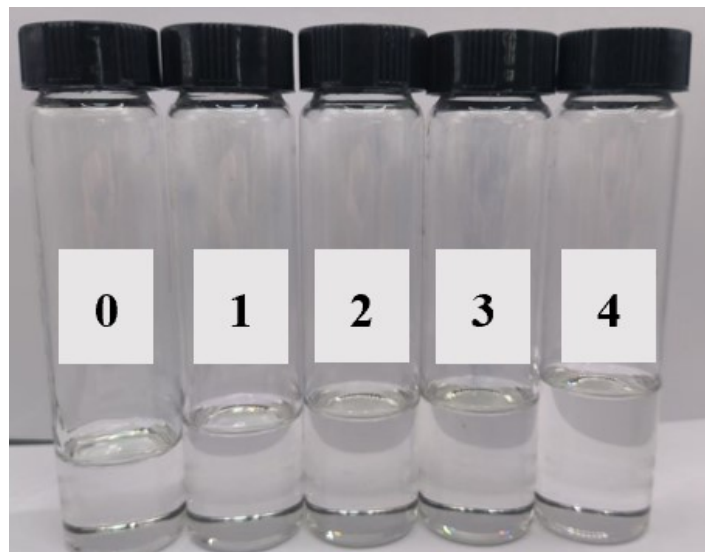

**Figure S2** Digital images of DES with varying water content ( $\text{ChCl}:\text{CA}:\text{H}_2\text{O}=1:1:\text{X}$ ,  $\text{X}=0-4$ ).

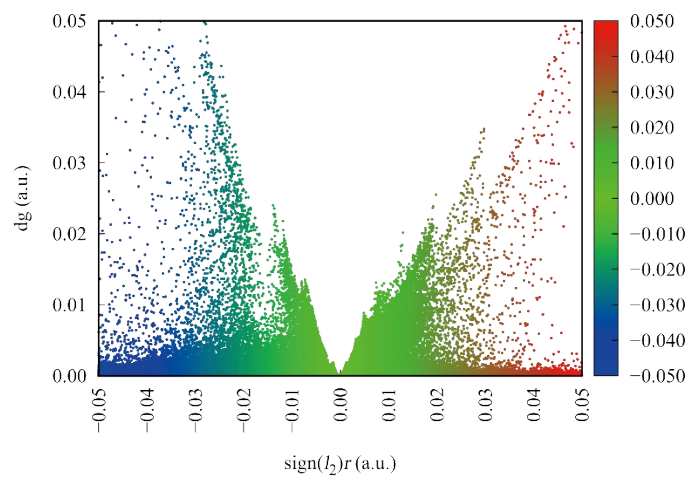

**Figure S3** Independent Gradient Model (IGMH) analysis of hydrogen bond formation between choline chloride (ChCl) and citric acid (CA).

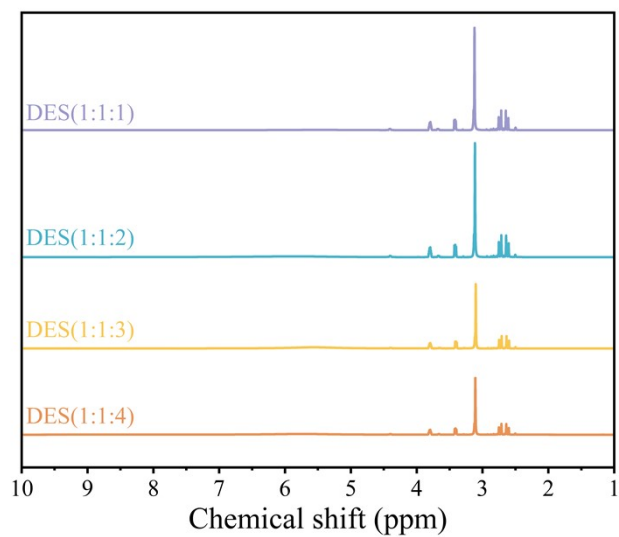

**Figure S4** <sup>1</sup>H NMR spectra of DES with varying water content (ChCl:CA:H<sub>2</sub>O).

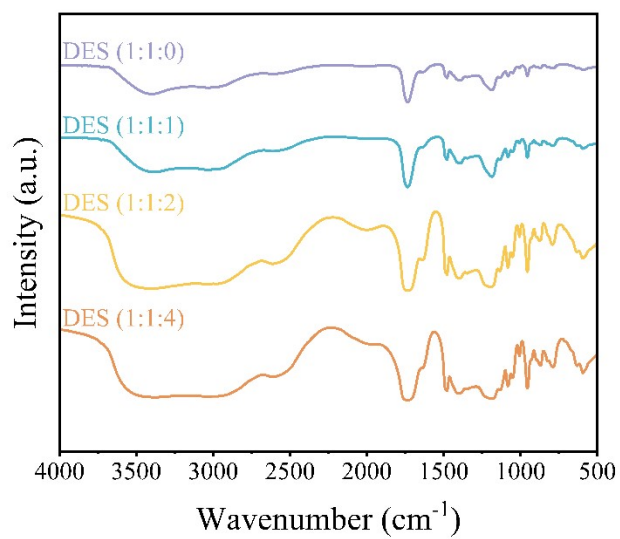

**Figure S5** FTIR spectra of DES with varying water content (ChCl:CA:H<sub>2</sub>O).

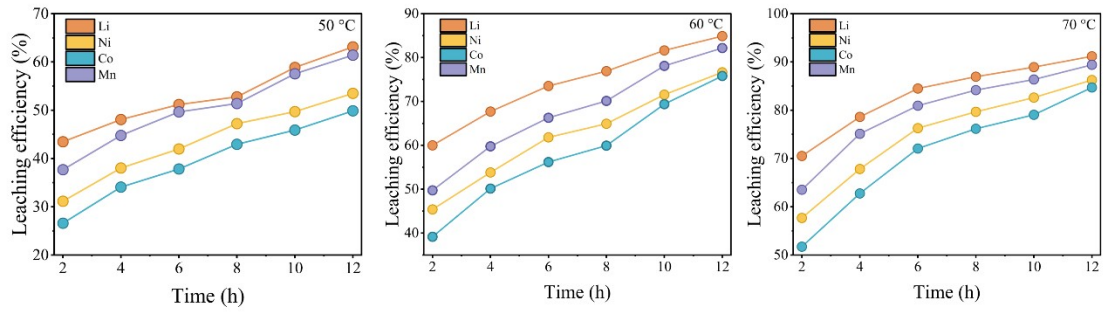

**Figure S6** Leaching efficiency trends of Li, Ni, Co, and Mn over time at different temperatures.

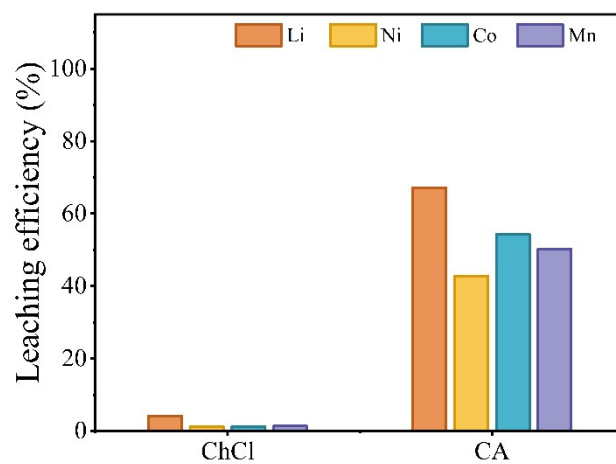

**Figure S7** Leaching efficiency of Li, Ni, Co, and Mn in individual ChCl and CA reactions with NCM523 (Temperature=80 °C, leaching time=8 h, slurry concentration (L/S)=15 g/g).

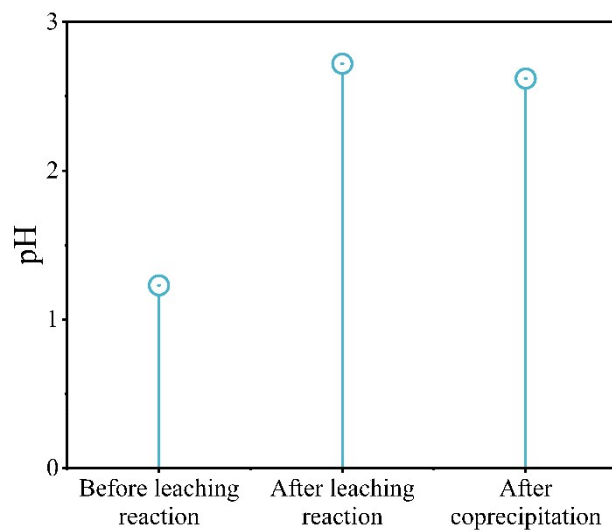

**Figure S8** pH variation before and after reaction of DES with NCM523.

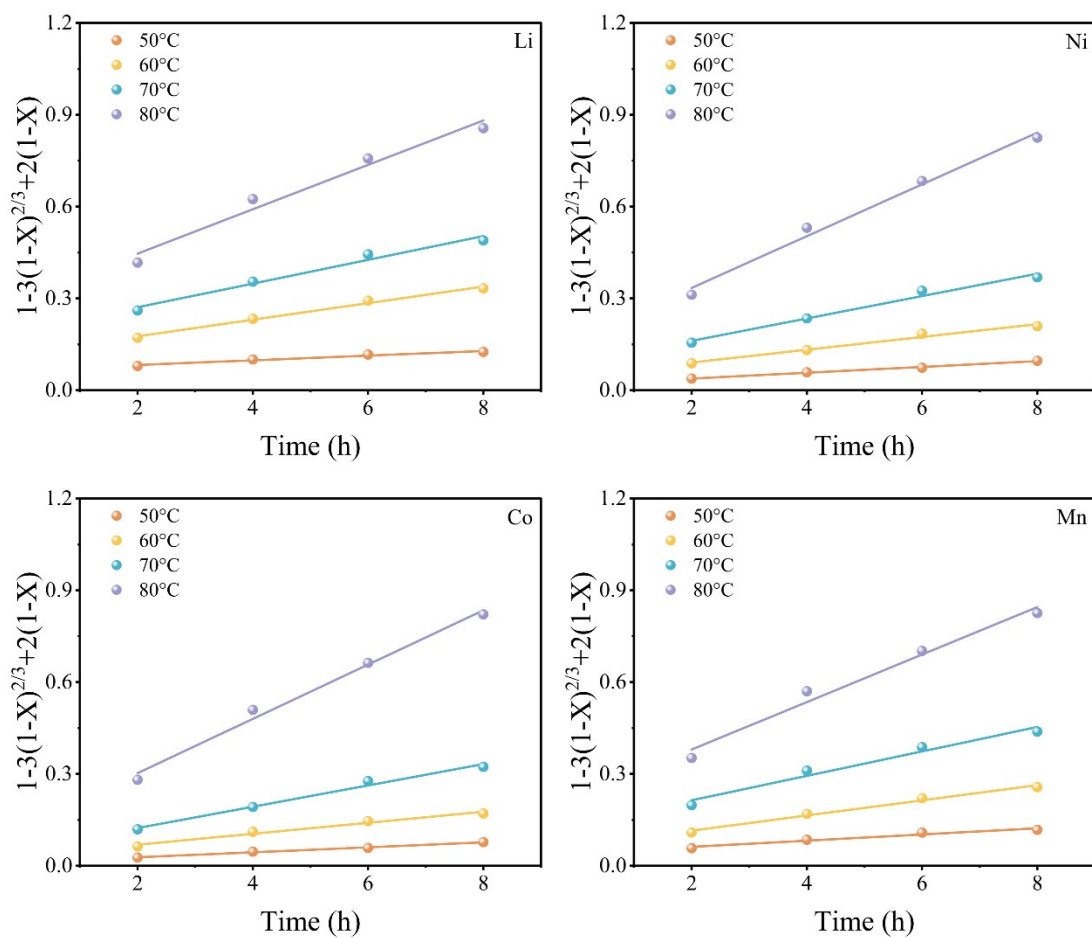

**Figure S9** Fitting analysis of  $1-3(1-x)^{2/3}+2(1-x)$  for Li, Ni, Co, and Mn in DES leaching system at different temperatures.

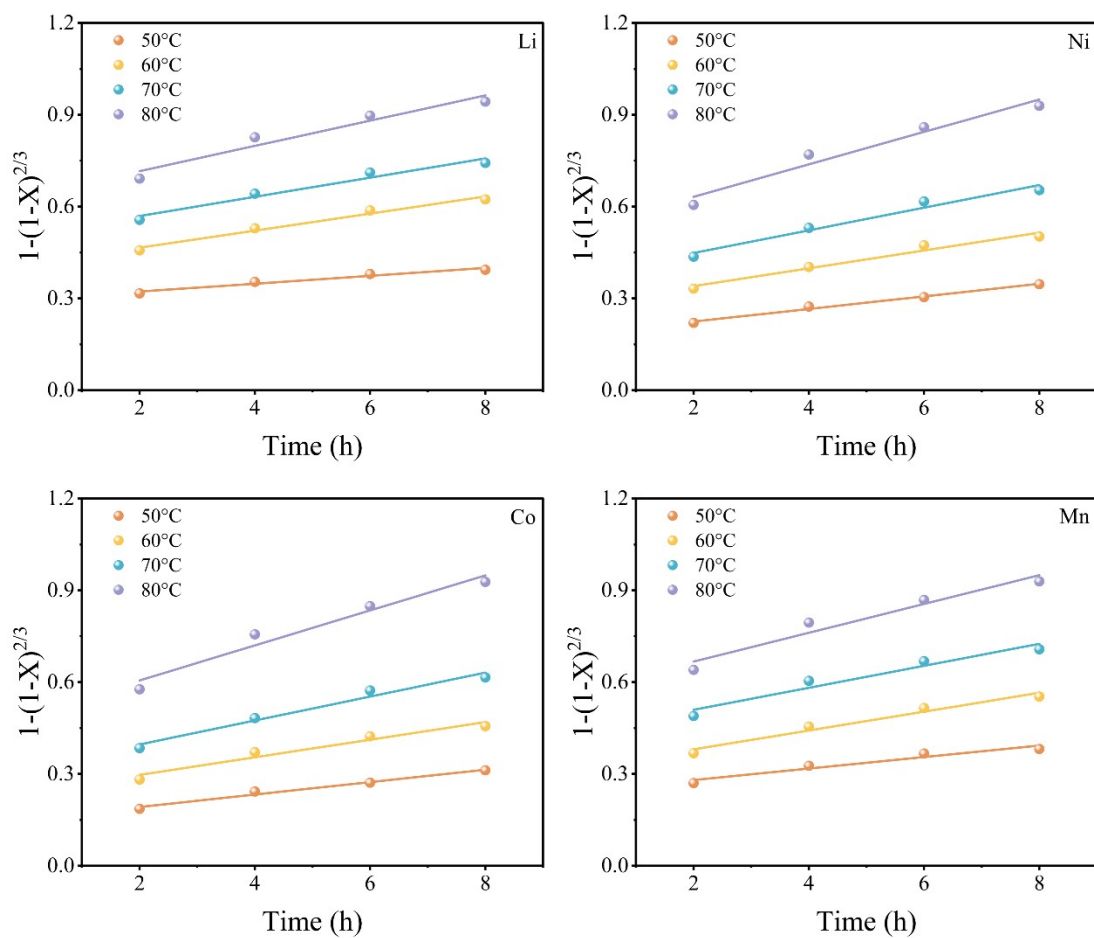

**Figure S10** Fitting analysis of  $1-(1-x)^{2/3}$  for Li, Ni, Co, and Mn in DES leaching system at different temperatures.

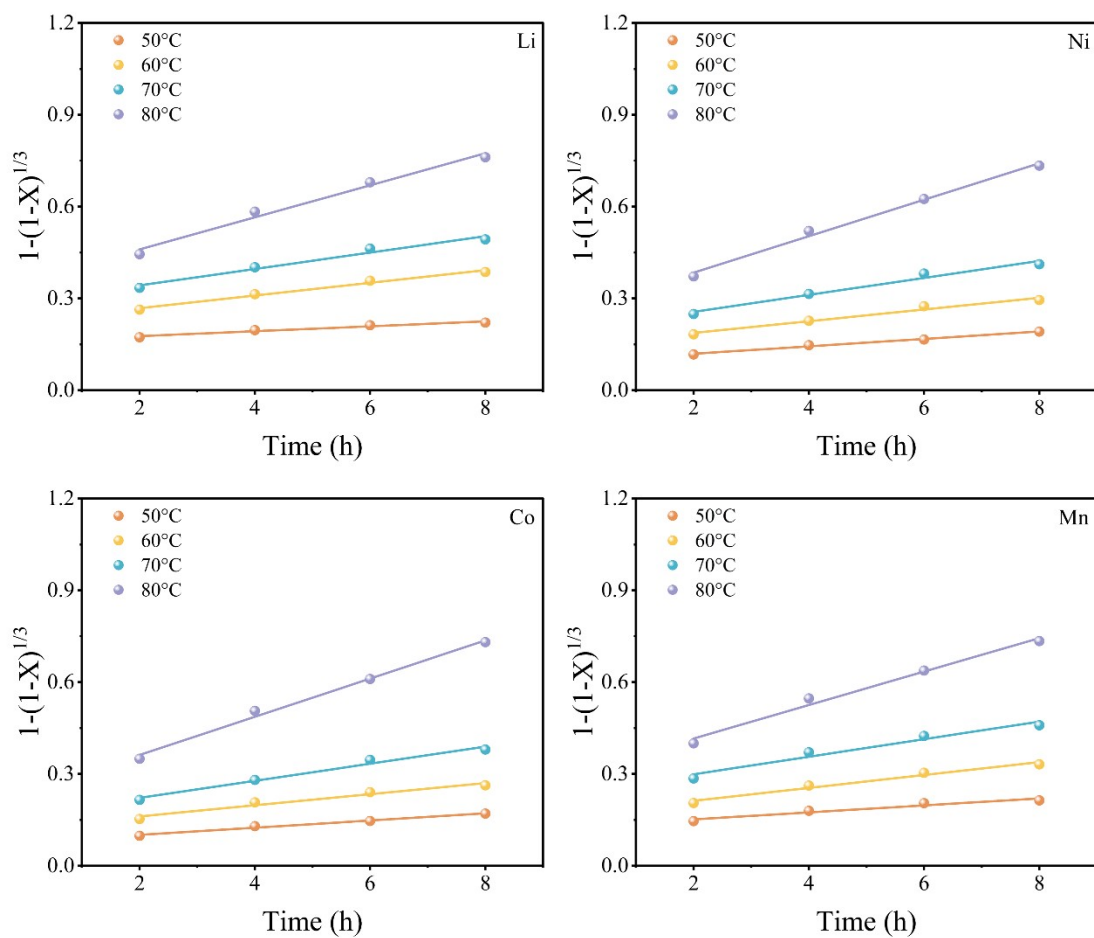

**Figure S11** Fitting analysis of  $1-(1-x)^{1/3}$  for Li, Ni, Co, and Mn in DES leaching system at different temperatures.

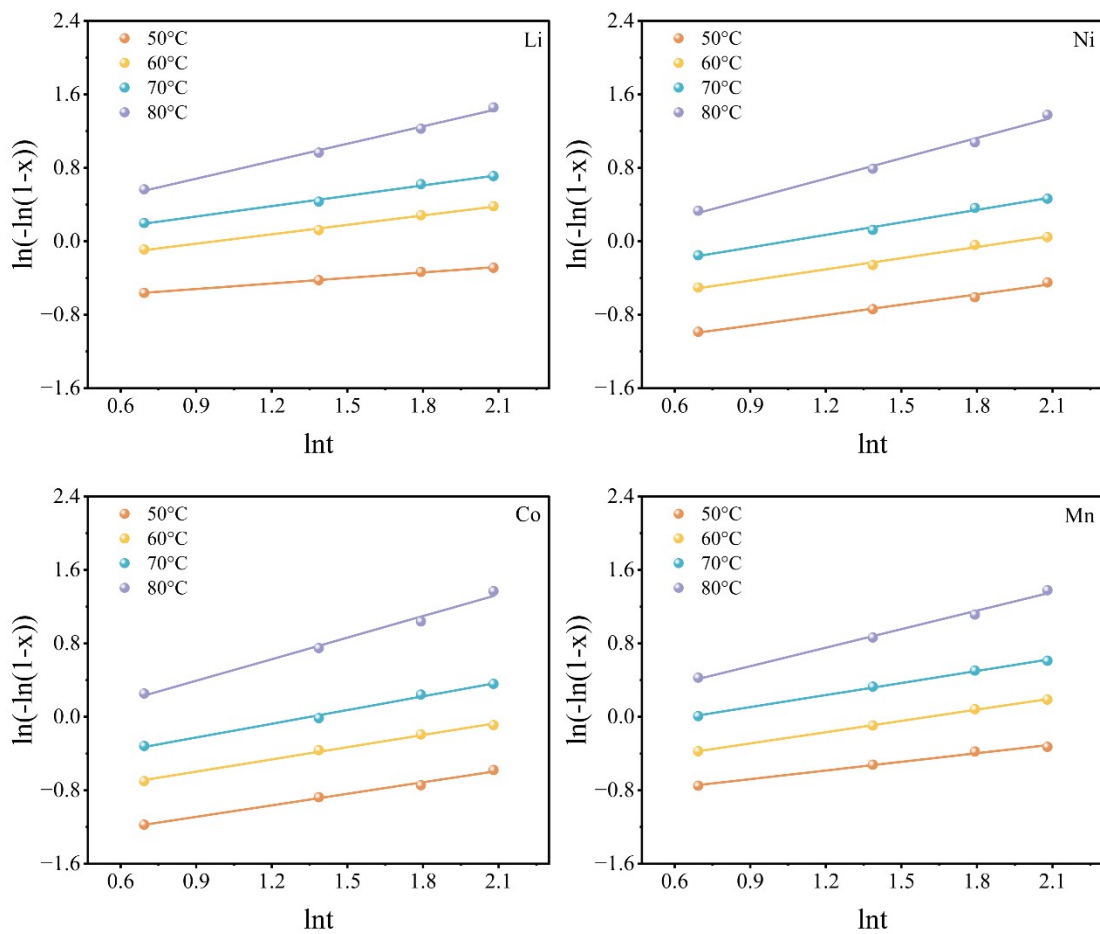

**Figure S12** Avrami model fitting analysis of Li, Ni, Co, and Mn in DES leaching system at different temperatures.

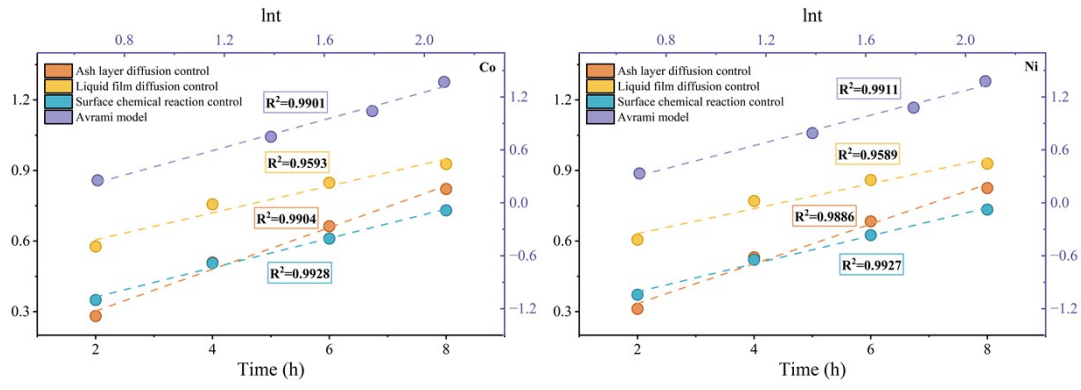

Figure S13 Comparison of kinetic models for Co and Ni.

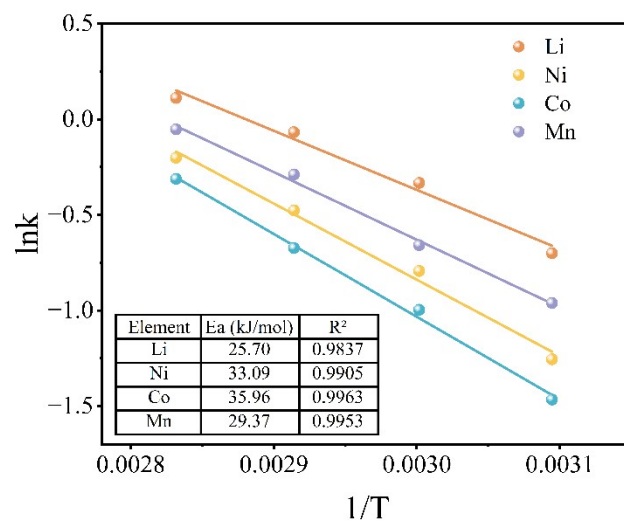

**Figure S14** Arrhenius equation fitting results for Li, Ni, Co, and Mn in DES leaching system.

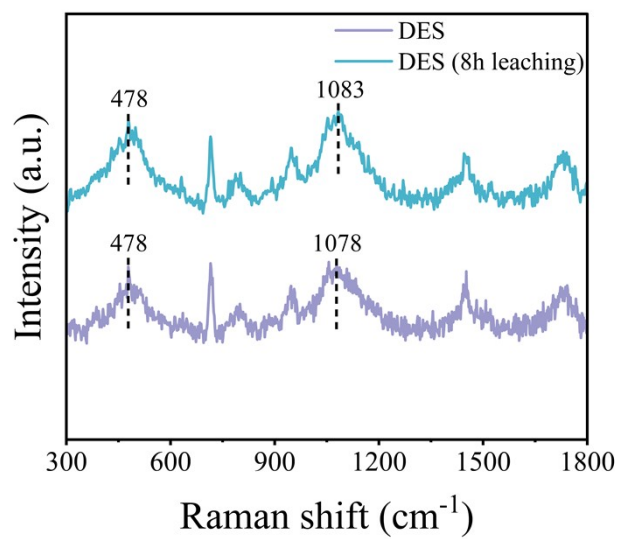

**Figure S15** Raman spectra of raw DES and DES leachate.

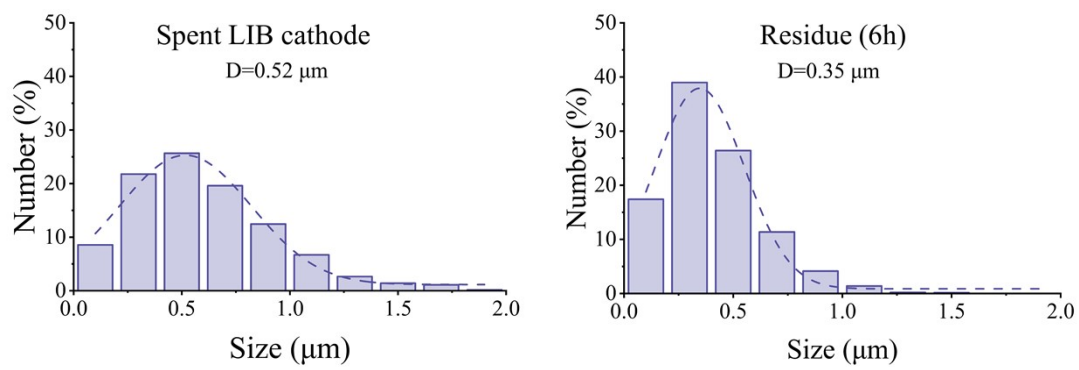

**Figure S16** Particle size distribution of discarded LIB cathode and leachate residue after 6 h.

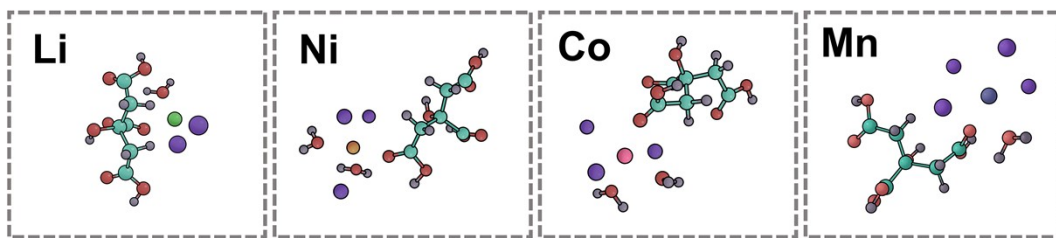

Figure S17 schematic coordination structures of different metals.

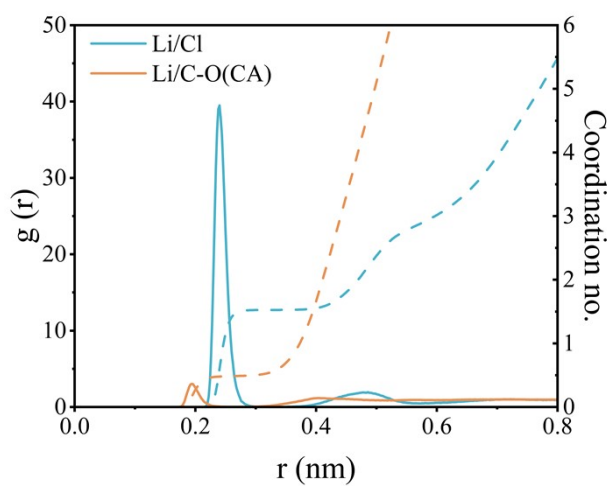

Figure S18 radial distribution functions (RDFs) of DES molecules around  $\text{Li}^+$ .

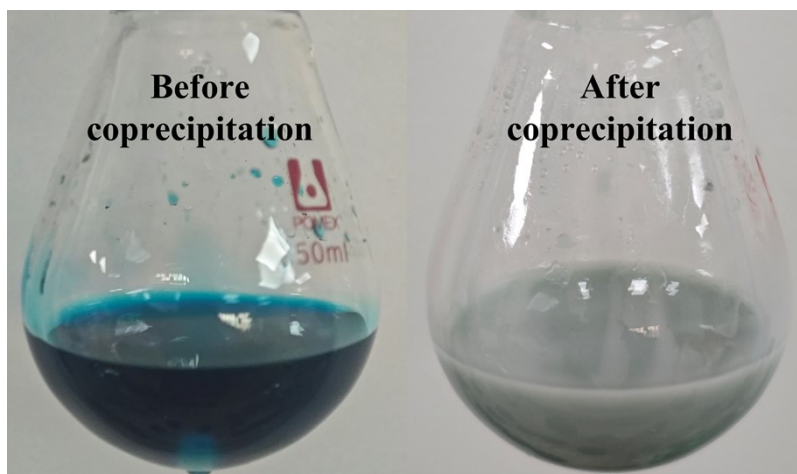

**Figure S19** Digital images of DES leachate before and after coprecipitation.

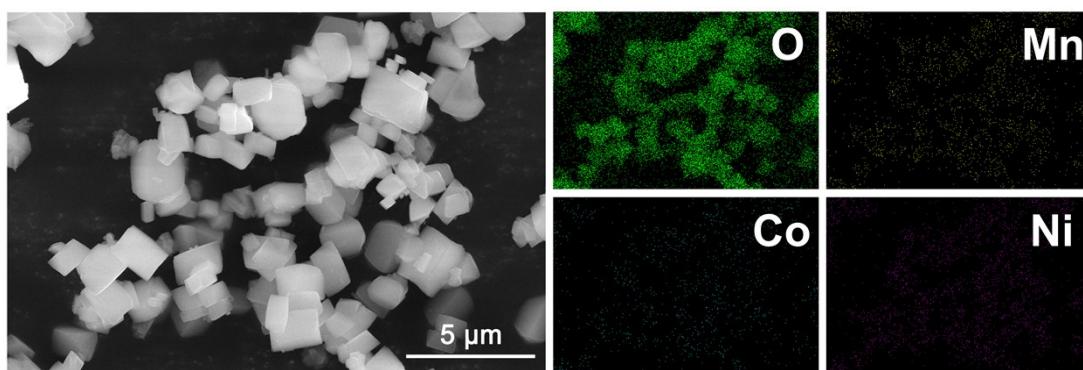

**Figure S20** SEM image and EDS mapping of oxalate coprecipitation.

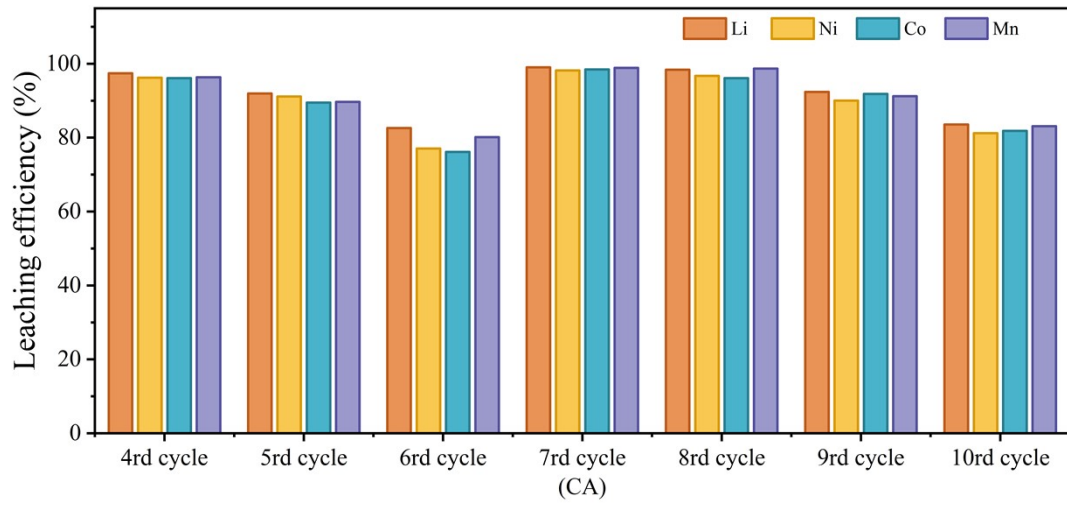

**Figure S21** Cyclic leaching performance of the DES with CA supplementation.

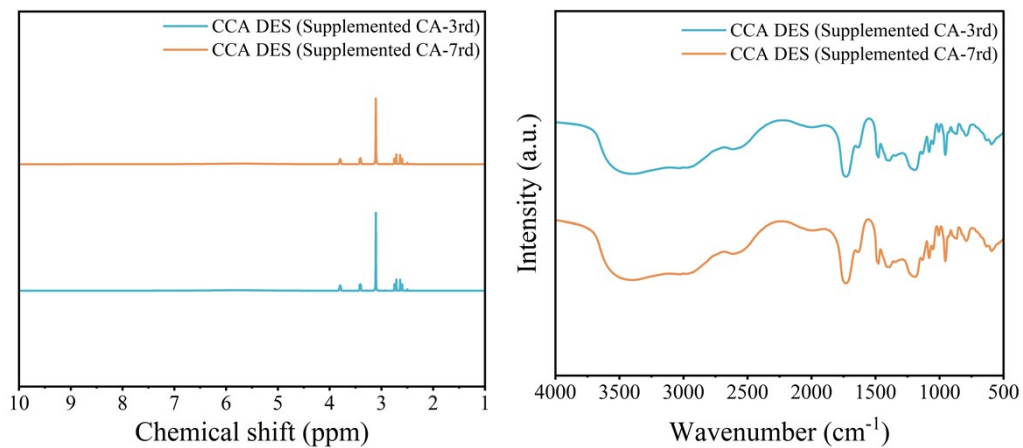

**Figure S22** <sup>1</sup>H NMR spectra and FTIR spectra of DES (Supplemented CA).

| Gram-scale leaching tests                                                                                                                      | Metal | Leaching efficiency |
|------------------------------------------------------------------------------------------------------------------------------------------------|-------|---------------------|
| 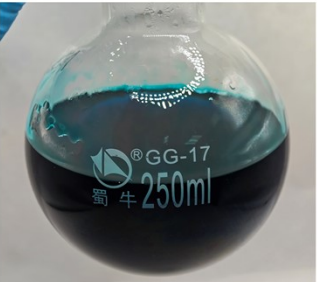 <p data-bbox="352 629 671 672"><b>15 g NCM:225 g DES</b></p> | Li    | 99.07%              |
|                                                                                                                                                | Ni    | 98.68%              |
|                                                                                                                                                | Co    | 98.46%              |
|                                                                                                                                                | Mn    | 98.78%              |

**Figure S23** Gram-scale leaching experiments.

**Table S1** Acid dissociation constants (pK<sub>a</sub>) and VIP values of common organic acids

| Acid          | Structural formula                                                                  | pK <sub>a</sub> | VIP (kJ·mol <sup>-1</sup> ) |
|---------------|-------------------------------------------------------------------------------------|-----------------|-----------------------------|
| Citric acid   | 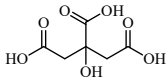   | 3.09            | 922.97                      |
| Malic acid    |    | 3.45            | 907.77                      |
| Lactic acid   |    | 3.86            | 927.63                      |
| Acetic acid   |    | 4.76            | 1004.73                     |
| Oxalic acid   |    | 2.83            | 995.17                      |
| Formic acid   |    | 3.77            | 1063.77                     |
| Glycolic acid |   | 3.83            | 961.91                      |
| Succinic acid |  | 4.16            | 952.16                      |

**Table S2** Kinetic parameters for the leaching of Li, Ni, Co, and Mn at different temperatures using the unreacted shrinking core model.

| Kinetics                      | Temperature(°C ) | Li             |         | Ni             |         | Co             |         | Mn             |         |
|-------------------------------|------------------|----------------|---------|----------------|---------|----------------|---------|----------------|---------|
|                               |                  | R <sup>2</sup> | k       |
| Ash layer diffusion control   | 323.15           | 0.96948        | 0.00764 | 0.99377        | 0.0095  | 0.99213        | 0.00817 | 0.95804        | 0.01014 |
|                               | 333.15           | 0.99090        | 0.02715 | 0.98173        | 0.02087 | 0.98000        | 0.01794 | 0.98709        | 0.02476 |
|                               | 343.15           | 0.97777        | 0.03877 | 0.98271        | 0.03658 | 0.98808        | 0.03484 | 0.97098        | 0.03995 |
|                               | 353.15           | 0.97203        | 0.07254 | 0.98863        | 0.08461 | 0.99042        | 0.08875 | 0.97955        | 0.0776  |
| Liquid film diffusion control | 323.15           | 0.95786        | 0.01287 | 0.99051        | 0.02056 | 0.98338        | 0.02032 | 0.94010        | 0.01871 |
|                               | 333.15           | 0.97918        | 0.02791 | 0.96997        | 0.02913 | 0.95406        | 0.02876 | 0.96843        | 0.03081 |
|                               | 343.15           | 0.96309        | 0.03133 | 0.96825        | 0.037   | 0.97357        | 0.03915 | 0.94563        | 0.03591 |
|                               | 353.15           | 0.94236        | 0.04127 | 0.95887        | 0.05301 | 0.95932        | 0.0572  | 0.94802        | 0.04708 |
| Chemical reaction control     | 323.15           | 0.96091        | 0.00803 | 0.99198        | 0.01216 | 0.98569        | 0.01174 | 0.94444        | 0.01142 |
|                               | 333.15           | 0.98557        | 0.0207  | 0.97453        | 0.01917 | 0.96187        | 0.01818 | 0.97629        | 0.02109 |
|                               | 343.15           | 0.97420        | 0.02681 | 0.97664        | 0.02772 | 0.98122        | 0.02795 | 0.96173        | 0.02871 |
|                               | 353.15           | 0.98443        | 0.05231 | 0.99276        | 0.05951 | 0.99282        | 0.06239 | 0.98646        | 0.05467 |

**Table S3** Avrami model fitting parameters for the leaching of Li, Ni, Co, and Mn at different temperatures.

| Temperatur<br>e (K) | Li             |          |                | Ni             |          |                | Co             |          |                | Mn             |          |                |
|---------------------|----------------|----------|----------------|----------------|----------|----------------|----------------|----------|----------------|----------------|----------|----------------|
|                     | R <sup>2</sup> | lnk      | n <sub>c</sub> |
| 323.15              | 0.99803        | -0.69957 | 0.20061        | 0.99066        | -1.25484 | 0.37631        | 0.99365        | -1.46518 | 0.41816        | 0.99169        | -0.96029 | 0.31369        |
| 333.15              | 0.99633        | -0.33236 | 0.34119        | 0.99104        | -0.79325 | 0.40671        | 0.99632        | -0.99546 | 0.44346        | 0.99951        | -0.65808 | 0.40948        |
| 343.15              | 0.99522        | -0.06778 | 0.37614        | 0.99301        | -0.47581 | 0.45501        | 0.99425        | -0.67299 | 0.4984         | 0.99827        | -0.28854 | 0.4385         |
| 353.15              | 0.99536        | 0.11174  | 0.63407        | 0.99114        | -0.20127 | 0.73743        | 0.99006        | -0.31076 | 0.78266        | 0.99384        | -0.05249 | 0.67188        |

**Table S4** XRD refinement parameters of NCM523 and Residue (6 h).

| Sample      | c/a    | Li/Ni (%) | I <sub>003</sub> /I <sub>104</sub> | R <sub>wp</sub> | Chi2 |
|-------------|--------|-----------|------------------------------------|-----------------|------|
| NCM523      | 4.9595 | 11.8      | 2.06                               | 5.72            | 2.63 |
| Residue(6h) | 4.9541 | 20        | 1.10                               | 6.07            | 2.97 |

**Table S5** Atomic percentage of Ni 2p, Co 2p, and Mn 2p on the surface of NCM523 and various leaching residues at different times.

| Sample      | Ni <sup>3+</sup> /Ni <sup>2+</sup> | Co <sup>3+</sup> /Co <sup>2+</sup> | Mn <sup>4+</sup> /Mn <sup>2+</sup> |
|-------------|------------------------------------|------------------------------------|------------------------------------|
| NCM523(0h)  | 57.79/42.21                        | 60.73/39.28                        | 31.14/68.86                        |
| Residue(2h) | 49.56/50.44                        | 56.19/43.82                        | 28.40/71.60                        |
| Residue(4h) | 31.68/68.32                        | 48.94/51.05                        | 20.63/79.37                        |
| Residue(6h) | 22.68/77.32                        | 42.04/57.97                        | 0/100.00                           |

**Table S6** Theoretical citric acid supplement calculated from the total electron requirement for NCM reduction

| Cycles | Mass (g) | Leaching efficiencies (%) |       |       | The number of electrons required for NCM reduction (mol) | CA consumption (g) | CA supplement (g) |
|--------|----------|---------------------------|-------|-------|----------------------------------------------------------|--------------------|-------------------|
|        |          | Ni                        | Co    | Mn    |                                                          |                    |                   |
| 0      | 0.2      | 98.12                     | 98.05 | 98.13 | 0.0020                                                   | 0.2135             |                   |
| 1      | 0.2      | 97.42                     | 97.17 | 97.60 | 0.0020                                                   | 0.2121             |                   |
| 2      | 0.2      | 80.36                     | 79.87 | 82.27 | 0.0017                                                   | 0.1772             | 0.6028            |
| 3      | 0.2      | 97.73                     | 97.44 | 98.01 | 0.0020                                                   | 0.2129             |                   |
| 4      | 0.2      | 96.22                     | 96.11 | 96.33 | 0.0020                                                   | 0.2095             |                   |
| 5      | 0.2      | 91.15                     | 89.47 | 89.66 | 0.0019                                                   | 0.1957             |                   |
| 6      | 0.2      | 77.06                     | 76.13 | 80.12 | 0.0016                                                   | 0.1713             | 0.7894            |

Calculation instructions:

Reaction equation:

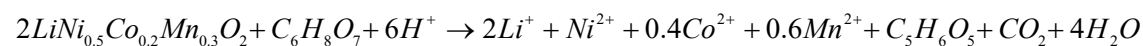

Calculated based on the total number of electrons required for reduction:

$$m_{CA} = \frac{n_{e^-}}{2} \times M_{CA} = \frac{n_{NCM} \times (0.2\eta_{Ni} + 0.2\eta_{Co} + 0.6\eta_{Mn})}{2} \times M_{CA}$$

where  $m_{CA}$  is the mass of CA consumed (g),  $n_{e^-}$  is the number of electrons required for NCM reduction (mol),  $M_{CA}$  is the molar mass of CA,  $n_{NCM}$  is the amount of NCM required (mol),  $\eta$  is the leaching efficiency of each metal.

**Table S7** Comparison with previously reported DES systems.

| DES           | Temperature (°C) | Solid-liquid ratio (g/L) | Leaching efficiency (%)                        |
|---------------|------------------|--------------------------|------------------------------------------------|
| CPL+UR+F<br>A | 120              | 20                       | Li(93.4), Ni(87.8),<br>Co(89.6), Mn(90.1)      |
| EG+CA         | 150              | 20                       | Li(99.99), Ni(99.86),<br>Co(100.00), Mn(99.93) |
| EG+GA         | 140              | 26                       | Li(92.61), Ni(91.67),<br>Co(90.04), Mn(94.17)  |
| ChCl+PA       | 100              | 11.11                    | Li(97.7), Ni(96.4),<br>Co(97.0), Mn(93.0)      |
| BeCl+FA       | 140              | 20                       | Li(98.03), Ni(92.35),<br>Co(94.19), Mn(96.01)  |
| This work     | 80               | 103.33                   | Li(98.64), Ni(98.12),<br>Co(98.05), Mn(98.13)  |

CPL: caprolactam, UR: urea, FA: formic acid, EG: ethylene glycol, GA: gluconic acid, PA: phenylphosphinic acid, BeCl: betaine hydrochloride.

To ensure the fairness and accuracy of the comparison, the solid-liquid ratio of all DES systems was uniformly converted to the same unit. The density of DES in this study is 1.55 g/ml.

**Table S8** Life cycle analysis of Pyrometallurgical recycling.

| Procedures             | Input                         | Amount   | Output                      | Amount  | Notes                                                                                                                                                                                                                             |
|------------------------|-------------------------------|----------|-----------------------------|---------|-----------------------------------------------------------------------------------------------------------------------------------------------------------------------------------------------------------------------------------|
| Discharging & Crushing | Spent LIBs                    | 1.0 t    | Spent LIBs (100% SOD)       | 1.0 t   | 1 MJ electricity produces 0.13 kg GHG and 0.67 L water. 1 kg diesel produces 45.6 MJ energy. The data is estimated based on Everbatt 2023. 5 wt% NaCl solution is used for the discharging process. <sup>[1-3]</sup>              |
|                        | Energy                        | 30 MJ    | GHG                         | 4 kg    |                                                                                                                                                                                                                                   |
|                        | Water                         | 520 L    |                             |         |                                                                                                                                                                                                                                   |
|                        | NaCl                          | 0.3 kg   |                             |         |                                                                                                                                                                                                                                   |
| Smelting               | Spent LIBs (100% SOD)         | 1.0 t    | Matte (Co, Ni, Mn, Fe, Cu)  | 0.4 t   | The purpose is to reduce the transition metals and remove all the impurities. The by products include the slag with Al, Ca and Li, which requires the post-treatment to recycle the Li salts. The temperature is ~1873 K for 3 h. |
|                        | SiO <sub>2</sub> /CaO mixture | 0.3 t    | Slag (Li, Al, Ca-contained) | 0.41 t  |                                                                                                                                                                                                                                   |
|                        | Energy                        | 10700 MJ | GHG                         | 1400 kg |                                                                                                                                                                                                                                   |
|                        | Water                         | 7169 L   |                             |         |                                                                                                                                                                                                                                   |
| Gas treatment          | Energy                        | 1300 MJ  | GHG                         | 170 kg  |                                                                                                                                                                                                                                   |
|                        | Water                         | 870 L    |                             |         |                                                                                                                                                                                                                                   |
| Refine                 | Matte                         | 0.4 t    | Metal alloy                 | ~0.30 t |                                                                                                                                                                                                                                   |
|                        | Energy                        | 3 MJ     | GHG                         | 0.4 kg  |                                                                                                                                                                                                                                   |
|                        | Water                         | 2 L      | Cu                          | 0.08 t  |                                                                                                                                                                                                                                   |

**Table S9** Life cycle analysis of Hydrometallurgical recycling.

| Procedures                | Input                              | Amount  | Output                              | Amount  | Notes                                                                                                                                                                                                                                                                                       |
|---------------------------|------------------------------------|---------|-------------------------------------|---------|---------------------------------------------------------------------------------------------------------------------------------------------------------------------------------------------------------------------------------------------------------------------------------------------|
| Discharging & Disassembly | <b>Spent LIBs</b>                  | 1.00 t  | <b>NCM523 cathode</b>               | 0.48 t  | The data is estimated based on Everbatt 2023. 5 wt% NaCl solution is used for the discharging process. <sup>[1,2]</sup> 1 MJ electricity produces 0.13 kg GHG and 0.67 L water. 1 kg diesel produces 45.6 MJ energy.                                                                        |
|                           | Energy                             | 30 MJ   | GHG                                 | 4 kg    |                                                                                                                                                                                                                                                                                             |
|                           | Water                              | 520 L   |                                     |         |                                                                                                                                                                                                                                                                                             |
|                           | NaCl                               | 0.3 kg  |                                     |         |                                                                                                                                                                                                                                                                                             |
| Thermal treatment         | <b>NCM523 cathode</b>              | 0.48 t  | <b>NCM523 Powder</b>                | 0.35 t  | The purpose is to separate the active materials with current collectors, to decompose the binder, electrolyte residue and SEI components. The temperature is ~873 K for 2 h. <sup>[4]</sup>                                                                                                 |
|                           | Energy                             | 2900 MJ | Al foil                             | 0.1 t   |                                                                                                                                                                                                                                                                                             |
|                           |                                    |         | GHG                                 | 377 kg  |                                                                                                                                                                                                                                                                                             |
| Acid leaching             | <b>NCM523 Powder</b>               | 0.35 t  | <b>Leachate</b>                     | 12.8 t  | Leaching conditions: H <sub>2</sub> SO <sub>4</sub> =2 mol/L, 3% H <sub>2</sub> O <sub>2</sub> , stirring speed=400 rpm, pulp density=50 g/L, and T=60 °C, 1 hour. <sup>[5]</sup> Concentrated H <sub>2</sub> SO <sub>4</sub> is 1.84 g/mL. 30% H <sub>2</sub> O <sub>2</sub> is ~1.11 g/mL |
|                           | Energy                             | 2100 MJ | GHG                                 | 273 kg  |                                                                                                                                                                                                                                                                                             |
|                           | Water                              | 10810 L |                                     |         |                                                                                                                                                                                                                                                                                             |
|                           | 98% H <sub>2</sub> SO <sub>4</sub> | 743 L   |                                     |         |                                                                                                                                                                                                                                                                                             |
|                           | H <sub>2</sub> O <sub>2</sub>      | 204 L   |                                     |         |                                                                                                                                                                                                                                                                                             |
| Chemical precipitation    | <b>Leachate</b>                    | 12.8 t  | <b>Compounds (Ni, Co and Mn)</b>    | 13.34 t | The solution degree of Na <sub>2</sub> CO <sub>3</sub> is 40 g/100g (30 °C). Reaction 6 h.                                                                                                                                                                                                  |
|                           | Na <sub>2</sub> CO <sub>3</sub>    | 193 kg  | <b>Li<sub>2</sub>CO<sub>3</sub></b> | 134 kg  |                                                                                                                                                                                                                                                                                             |
|                           | Energy                             | 1150 MJ | GHG                                 | 150 kg  |                                                                                                                                                                                                                                                                                             |
|                           | Water                              | 483 L   |                                     |         |                                                                                                                                                                                                                                                                                             |

**Table S10** Life cycle analysis of this work

| Procedures                | Input                 | Amount  | Output                              | Amount | Notes                                                                                                                                                                                                |
|---------------------------|-----------------------|---------|-------------------------------------|--------|------------------------------------------------------------------------------------------------------------------------------------------------------------------------------------------------------|
| Discharging & Disassembly | <b>Spent LIBs</b>     | 1.00 t  | <b>NCM523 cathode</b>               | 0.48 t | 1 MJ electricity produces 0.13 kg GHG and 0.67 L water. 1 kg diesel produces 45.6 MJ energy. The data is estimated based on Everbatt 2020. ~5 wt% NaCl solution is used for the discharging process. |
|                           | Energy                | 30 MJ   | GHG                                 | 4 kg   |                                                                                                                                                                                                      |
|                           | Water                 | 520 L   |                                     |        |                                                                                                                                                                                                      |
|                           | NaCl                  | 0.3 kg  |                                     |        |                                                                                                                                                                                                      |
| Thermal treatment         | <b>NCM523 cathode</b> | 0.48 t  | <b>NCM523 Powder</b>                | 0.35 t | The purpose is to separate the active materials with current collectors, to decompose the binder, electrolyte residue and SEI components. The temperature is ~873 K for 2 h. <sup>[4]</sup>          |
|                           | Energy                | 2900 MJ | GHG                                 | 377 kg |                                                                                                                                                                                                      |
|                           |                       |         | Al foil                             | 0.1 t  |                                                                                                                                                                                                      |
| <b>DES</b> leaching       | <b>NCM523 Powder</b>  | 0.35 t  | <b>Leachate</b>                     | 2.7 t  | DES recycling                                                                                                                                                                                        |
|                           | Energy                | 2190 MJ | GHG                                 | 285 kg |                                                                                                                                                                                                      |
|                           | Water                 | 896 L   |                                     |        |                                                                                                                                                                                                      |
|                           | choline chloride      | 580 kg  |                                     |        |                                                                                                                                                                                                      |
|                           | CA H <sub>2</sub> O   | 872 kg  |                                     |        |                                                                                                                                                                                                      |
| Chemical precipitation    | <b>Leachate</b>       | 2.7 t   | <b>oxalic acid co-precipitation</b> | 0.52 t |                                                                                                                                                                                                      |
|                           | Oxalic acid           | 394 kg  | <b>Li solution</b>                  | 2.18 t |                                                                                                                                                                                                      |
|                           | Energy                | 210 MJ  | GHG                                 | 28 kg  |                                                                                                                                                                                                      |
|                           | Water                 | 3500 L  |                                     |        |                                                                                                                                                                                                      |

**Table S11** The specific price of different materials involved.

| Materials                       | Prices (\$/t) |
|---------------------------------|---------------|
| Spent Lithium-ion battery       | 2139          |
| H <sub>2</sub> SO <sub>4</sub>  | 212           |
| H <sub>2</sub> O <sub>2</sub>   | 283           |
| Na <sub>2</sub> CO <sub>3</sub> | 354           |
| NaCl                            | 43            |
| choline chloride                | 354           |
| CA H <sub>2</sub> O             | 425           |
| Oxalic acid                     | 283           |
| Li <sub>2</sub> CO <sub>3</sub> | 8076          |
| Li salt                         | 3256          |
| Al foil                         | 2123          |
| Cu                              | 2194          |
| oxalic acid co-precipitation    | 7637          |
| Metal alloy                     | 9910          |

[1] M. Wang A E, U. Lee, A. Bafana, P. T. Benavides, A. Burnham, H. Cai, Q. Dai, U. R. , Gracida-Alvarez T R H, P. V. Jaquez, J. C. Kelly, H. Kwon, Z. Lu, X. Liu, L. Ou, P. Sun, O. , Winjobi H X, E. Yoo, G. G. Zaines,. <https://www.greencarcongress.com/2021/10/20211012-greet.html> [M]. 2020.

[2] Q. Dai L G, J. Spangenberg, J. C. Kelly, S. Ahmed, M. Wang. Everbatt: A closed-loop battery recycling cost and environmental impacts model; [www.Anl.Gov/egs/everbatt](http://www.Anl.Gov/egs/everbatt). [M]. 2019.

[3] Lv X W, Lin J, Zhang X D, et al. Selective Recycling of Spent Lithium-Ion Batteries Enables Toward Aqueous Zn-Ion Batteries Cathode [J]. *Advanced Energy Materials*, 2024,

[4] Zheng Y, Wang S, Gao Y, et al. Lithium Nickel Cobalt Manganese Oxide Recovery via Spray Pyrolysis Directly from the Leachate of Spent Cathode Scraps [J]. *Acs Applied Energy Materials*, 2019, 2(9): 6952-6959.

[5] Liu T C, Chen J, Li H L, et al. An integrated process for the separation and recovery of valuable metals from the spent  $\text{LiNi}_{0.5}\text{Co}_{0.2}\text{Mn}_{0.3}\text{O}_2$  cathode materials [J]. *Separation and Purification Technology*, 2020, 245.
